# Supplementary material
Source: PubMed Central journal article supplement (PMC4788466)
Supplement: NIHMS761246-supplement-Supplemental_Tables.pdf [file NIHMS761246-supplement-Supplemental_Tables.pdf]

**Supplementary Table 1.** Empirical power (%) of tests for equality of three means with a Normal (0, 1) error distribution

| Alternative |          |      | Parametric tests |                  |                  |                  |       | Parametric tests based on INT |                  |                  |                  |       | Rank-based tests |              |                   |                   |       |
|-------------|----------|------|------------------|------------------|------------------|------------------|-------|-------------------------------|------------------|------------------|------------------|-------|------------------|--------------|-------------------|-------------------|-------|
| Model       | $\delta$ | $p$  | F (2 df)         | T <sub>ADD</sub> | T <sub>DOM</sub> | T <sub>REC</sub> | MAX3  | F (2 df)                      | T <sub>ADD</sub> | T <sub>DOM</sub> | T <sub>REC</sub> | MAX3  | KW               | MJT          | FW <sub>DOM</sub> | FW <sub>REC</sub> | MAX3  |
| Additive    | 0.2      | 0.03 | 14.88            | <b>19.27</b>     | 19.02            | 5.96             | 15.41 | 14.88                         | <b>19.24</b>     | 19.00            | 5.96             | 15.42 | 13.36            | <b>18.61</b> | 18.41             | 4.71              | 13.18 |
|             |          | 0.05 | 21.33            | <b>27.64</b>     | 27.06            | 6.93             | 22.42 | 21.30                         | <b>27.64</b>     | 27.06            | 6.93             | 22.41 | 20.25            | <b>26.65</b> | 26.18             | 6.56              | 21.06 |
|             |          | 0.1  | 37.76            | <b>47.29</b>     | 45.31            | 12.75            | 40.48 | 37.74                         | <b>47.30</b>     | 45.29            | 12.75            | 40.46 | 35.97            | <b>45.58</b> | 43.61             | 12.24             | 38.65 |
|             |          | 0.2  | 61.30            | <b>71.50</b>     | 66.47            | 30.86            | 65.47 | 61.28                         | <b>71.50</b>     | 66.41            | 30.80            | 65.42 | 59.26            | <b>69.46</b> | 64.45             | 29.73             | 63.33 |
|             |          | 0.3  | 73.78            | <b>82.43</b>     | 74.60            | 50.34            | 77.74 | 73.73                         | <b>82.41</b>     | 74.57            | 50.26            | 77.70 | 71.51            | <b>80.67</b> | 72.50             | 48.43             | 75.66 |
|             |          | 0.4  | 79.79            | <b>87.24</b>     | 76.72            | 64.76            | 83.51 | 79.78                         | <b>87.21</b>     | 76.70            | 64.74            | 83.46 | 77.78            | <b>85.74</b> | 74.78             | 62.65             | 81.74 |
|             |          | 0.5  | 81.35            | <b>88.54</b>     | 73.15            | 73.21            | 84.94 | 81.29                         | <b>88.48</b>     | 73.11            | 73.18            | 84.88 | 79.50            | <b>87.00</b> | 71.08             | 71.25             | 83.14 |
| Dominant    | 0.14     | 0.03 | 24.29            | 31.08            | <b>31.57</b>     | 5.34             | 24.84 | 24.23                         | 31.06            | <b>31.56</b>     | 5.34             | 24.80 | 22.81            | 30.00        | <b>30.36</b>      | 4.24              | 22.54 |
|             |          | 0.05 | 36.33            | 44.95            | <b>45.94</b>     | 5.90             | 37.56 | 36.32                         | 44.89            | <b>45.90</b>     | 5.93             | 37.57 | 34.86            | 43.46        | <b>44.26</b>      | 5.61              | 35.83 |
|             |          | 0.1  | 58.58            | 66.45            | <b>68.91</b>     | 7.97             | 60.73 | 58.53                         | 66.38            | <b>68.89</b>     | 7.94             | 60.65 | 56.43            | 64.58        | <b>67.00</b>      | 7.72              | 58.47 |
|             |          | 0.2  | 77.03            | 80.68            | <b>85.04</b>     | 12.89            | 79.08 | 77.01                         | 80.68            | <b>85.04</b>     | 12.88            | 79.07 | 74.95            | 78.97        | <b>83.41</b>      | 12.56             | 77.06 |
|             |          | 0.3  | 80.50            | 80.78            | <b>87.72</b>     | 15.98            | 82.38 | 80.47                         | 80.78            | <b>87.70</b>     | 15.97            | 82.35 | 78.63            | 79.14        | <b>86.32</b>      | 15.65             | 80.49 |
|             |          | 0.4  | 77.09            | 73.93            | <b>85.13</b>     | 16.36            | 79.01 | 77.06                         | 73.91            | <b>85.15</b>     | 16.35            | 79.00 | 75.07            | 71.91        | <b>83.50</b>      | 15.87             | 76.95 |
|             |          | 0.5  | 67.51            | 59.73            | <b>77.19</b>     | 14.43            | 69.65 | 67.52                         | 59.74            | <b>77.10</b>     | 14.42            | 69.59 | 65.35            | 57.72        | <b>75.20</b>      | 13.94             | 67.41 |
| Recessive   | 0.15     | 0.03 | 5.26             | 5.00             | 5.00             | <b>5.48</b>      | 5.27  | 5.25                          | 4.98             | 5.00             | <b>5.47</b>      | 5.25  | 3.85             | <b>5.01</b>  | 5.00              | 4.32              | 3.41  |
|             |          | 0.05 | 5.74             | 5.14             | 5.06             | <b>6.17</b>      | 5.69  | 5.72                          | 5.16             | 5.03             | <b>6.18</b>      | 5.70  | 5.25             | 5.12         | 4.97              | <b>5.82</b>       | 5.25  |
|             |          | 0.1  | 8.70             | 5.93             | 5.25             | <b>10.39</b>     | 8.62  | 8.74                          | 5.94             | 5.25             | <b>10.36</b>     | 8.57  | 8.39             | 5.82         | 5.18              | <b>9.98</b>       | 8.25  |
|             |          | 0.2  | 19.83            | 11.73            | 6.42             | <b>25.79</b>     | 20.27 | 19.82                         | 11.77            | 6.44             | <b>25.72</b>     | 20.28 | 18.98            | 11.40        | 6.30              | <b>24.82</b>      | 19.29 |
|             |          | 0.3  | 38.62            | 25.65            | 9.08             | <b>48.60</b>     | 40.02 | 38.62                         | 25.64            | 9.09             | <b>48.57</b>     | 39.96 | 37.14            | 24.64        | 8.88              | <b>46.62</b>      | 38.27 |
|             |          | 0.4  | 58.91            | 46.29            | 12.84            | <b>68.99</b>     | 60.86 | 58.87                         | 46.28            | 12.80            | <b>68.93</b>     | 60.86 | 56.74            | 44.46        | 12.48             | <b>67.01</b>      | 58.56 |
|             |          | 0.5  | 74.41            | 65.98            | 15.98            | <b>82.73</b>     | 76.32 | 74.38                         | 65.94            | 15.99            | <b>82.70</b>     | 76.25 | 72.26            | 63.99        | 15.61             | <b>81.14</b>      | 74.18 |
| Umbrella    | 0.15     | 0.03 | 26.89            | 32.91            | <b>34.40</b>     | 4.89             | 26.87 | 26.91                         | 32.94            | <b>34.34</b>     | 4.92             | 26.83 | 25.53            | 31.78        | <b>33.11</b>      | 3.86              | 24.49 |
|             |          | 0.05 | 40.30            | 46.03            | <b>49.19</b>     | 5.00             | 39.89 | 40.32                         | 46.02            | <b>49.13</b>     | 4.98             | 39.88 | 38.65            | 44.49        | <b>47.45</b>      | 4.68              | 38.02 |
|             |          | 0.1  | 63.02            | 62.21            | <b>70.21</b>     | 5.17             | 60.84 | 62.99                         | 62.13            | <b>70.17</b>     | 5.19             | 60.82 | 61.02            | 60.21        | <b>68.30</b>      | 5.11              | 58.61 |
|             |          | 0.2  | 80.62            | 62.22            | <b>81.44</b>     | 7.29             | 74.01 | 80.60                         | 62.16            | <b>81.41</b>     | 7.26             | 74.01 | 78.59            | 60.20        | <b>79.79</b>      | 7.20              | 71.82 |
|             |          | 0.3  | <b>85.15</b>     | 41.04            | 78.75            | 14.26            | 73.28 | <b>85.08</b>                  | 41.03            | 78.67            | 14.27            | 73.21 | <b>83.49</b>     | 39.52        | 76.82             | 13.96             | 71.01 |
|             |          | 0.4  | <b>85.89</b>     | 15.22            | 67.42            | 28.94            | 67.64 | <b>85.84</b>                  | 15.21            | 67.36            | 28.91            | 67.60 | <b>84.19</b>     | 14.77        | 65.50             | 27.83             | 65.36 |
|             |          | 0.5  | <b>86.09</b>     | 4.76             | 49.05            | 49.02            | 64.63 | <b>86.06</b>                  | 4.75             | 49.02            | 49.02            | 64.59 | <b>84.39</b>     | 4.79         | 47.39             | 47.25             | 62.23 |

Note: Based on 100,000 simulations. Maximum standard error of estimates 0.16%. Bold face indicates the highest power across each row and within each class of tests (parametric tests, rank tests, and parametric tests based on INT).

Abbreviations: KW – Kruskal-Wallis test

**Supplementary Table 2.** Empirical power (%) of tests for equality of three means under additive genetic model and different error distributions

| Error                                                      |          |      | Parametric tests |                  |                  |                  |       | Parametric tests based on INT |                  |                  |                  |       | Rank-based tests |              |                   |                   |       |
|------------------------------------------------------------|----------|------|------------------|------------------|------------------|------------------|-------|-------------------------------|------------------|------------------|------------------|-------|------------------|--------------|-------------------|-------------------|-------|
| Distribution                                               | $\delta$ | $p$  | F (2 df)         | T <sub>ADD</sub> | T <sub>DOM</sub> | T <sub>REC</sub> | MAX3  | F (2 df)                      | T <sub>ADD</sub> | T <sub>DOM</sub> | T <sub>REC</sub> | MAX3  | KW               | MJT          | FW <sub>DOM</sub> | FW <sub>REC</sub> | MAX3  |
| Normal<br>( $\mu = 0$ ,<br>$\sigma = 1$ )                  | 0.2      | 0.03 | 14.88            | <b>19.27</b>     | 19.02            | 5.96             | 15.41 | 14.88                         | 19.24            | 19.00            | 5.96             | 15.42 | 13.36            | 18.61        | 18.41             | 4.71              | 13.18 |
|                                                            |          | 0.05 | 21.33            | <b>27.64</b>     | 27.06            | 6.93             | 22.42 | 21.30                         | <b>27.64</b>     | 27.06            | 6.93             | 22.41 | 20.25            | 26.65        | 26.18             | 6.56              | 21.06 |
|                                                            |          | 0.1  | 37.76            | 47.29            | 45.31            | 12.75            | 40.48 | 37.74                         | <b>47.30</b>     | 45.29            | 12.75            | 40.46 | 35.97            | 45.58        | 43.61             | 12.24             | 38.65 |
|                                                            |          | 0.2  | 61.30            | <b>71.50</b>     | 66.47            | 30.86            | 65.47 | 61.28                         | <b>71.50</b>     | 66.41            | 30.80            | 65.42 | 59.26            | 69.46        | 64.45             | 29.73             | 63.33 |
|                                                            |          | 0.3  | 73.78            | <b>82.43</b>     | 74.60            | 50.34            | 77.74 | 73.73                         | 82.41            | 74.57            | 50.26            | 77.70 | 71.51            | 80.67        | 72.50             | 48.43             | 75.66 |
|                                                            |          | 0.4  | 79.79            | <b>87.24</b>     | 76.72            | 64.76            | 83.51 | 79.78                         | 87.21            | 76.70            | 64.74            | 83.46 | 77.78            | 85.74        | 74.78             | 62.65             | 81.74 |
|                                                            |          | 0.5  | 81.35            | <b>88.54</b>     | 73.15            | 73.21            | 84.94 | 81.29                         | 88.48            | 73.11            | 73.18            | 84.88 | 79.50            | 87.00        | 71.08             | 71.25             | 83.14 |
| Lognormal<br>( $\mu = 0$ ,<br>$\sigma = 1$ )               | 0.14     | 0.03 | 6.82             | 6.82             | 6.77             | 4.67             | 7.54  | 11.31                         | <b>17.69</b>     | 17.61            | 3.01             | 12.46 | 9.21             | 14.58        | 14.44             | 2.45              | 9.58  |
|                                                            |          | 0.05 | 7.65             | 7.68             | 7.65             | 5.11             | 8.23  | 18.29                         | <b>27.75</b>     | 27.45            | 3.88             | 20.43 | 14.58            | 21.49        | 21.14             | 4.13              | 15.74 |
|                                                            |          | 0.1  | 8.94             | 9.92             | 9.64             | 6.08             | 9.69  | 36.85                         | <b>49.98</b>     | 48.42            | 8.50             | 41.03 | 27.51            | 37.86        | 36.21             | 8.36              | 30.43 |
|                                                            |          | 0.2  | 11.23            | 13.20            | 12.27            | 8.03             | 12.27 | 64.21                         | <b>75.98</b>     | 71.83            | 26.45            | 68.88 | 47.93            | 59.78        | 54.75             | 22.54             | 52.54 |
|                                                            |          | 0.3  | 12.66            | 15.74            | 13.93            | 10.07            | 14.28 | 78.43                         | <b>87.08</b>     | 80.99            | 48.97            | 82.32 | 60.38            | 71.32        | 62.63             | 39.07             | 65.20 |
|                                                            |          | 0.4  | 13.94            | 17.58            | 14.36            | 12.33            | 15.96 | 85.00                         | <b>91.41</b>     | 83.44            | 66.82            | 88.07 | 67.39            | 77.18        | 64.41             | 53.17             | 72.05 |
|                                                            |          | 0.5  | 14.21            | 18.23            | 13.68            | 14.05            | 16.43 | 87.33                         | <b>92.77</b>     | 81.59            | 77.38            | 90.03 | 69.14            | 78.65        | 61.10             | 61.73             | 73.75 |
| Cauchy<br>(median = 0,<br>scale = 1)                       | 0.38     | 0.03 | 5.99             | 6.99             | 7.05             | 1.04             | 6.62  | 12.33                         | 15.85            | 15.62            | 5.27             | 12.70 | 14.82            | <b>20.52</b> | 20.21             | 4.25              | 14.62 |
|                                                            |          | 0.05 | 6.86             | 8.22             | 8.44             | 1.59             | 7.70  | 17.46                         | 22.87            | 22.36            | 6.38             | 18.28 | 23.13            | <b>30.18</b> | 29.53             | 6.99              | 24.20 |
|                                                            |          | 0.1  | 4.56             | 5.54             | 7.89             | 3.23             | 5.25  | 30.04                         | 38.77            | 37.04            | 10.79            | 32.37 | 40.92            | <b>50.98</b> | 49.00             | 13.29             | 43.81 |
|                                                            |          | 0.2  | 5.90             | 4.66             | 2.84             | 6.09             | 6.08  | 49.73                         | 60.36            | 55.42            | 24.85            | 53.99 | 65.31            | <b>75.25</b> | 70.30             | 33.18             | 69.21 |
|                                                            |          | 0.3  | 7.11             | 5.77             | 2.37             | 8.51             | 7.60  | 61.61                         | 71.95            | 63.59            | 40.66            | 66.43 | 77.57            | <b>85.47</b> | 78.21             | 53.33             | 81.21 |
|                                                            |          | 0.4  | 3.52             | 4.09             | 2.90             | 8.82             | 5.78  | 67.95                         | 77.42            | 65.26            | 53.63            | 72.61 | 83.06            | <b>89.65</b> | 79.70             | 68.11             | 86.24 |
|                                                            |          | 0.5  | 2.58             | 3.72             | 4.29             | 4.17             | 3.46  | 69.96                         | 79.30            | 62.08            | 61.97            | 74.67 | 84.97            | <b>90.92</b> | 76.72             | 76.64             | 87.78 |
| Empirical<br>SDMA<br>distribution<br>(mean = 0,<br>SD = 1) | 0.1      | 0.03 | 6.55             | 8.82             | 8.90             | 2.65             | 7.36  | 7.40                          | 9.37             | 9.23             | 4.80             | 7.68  | 6.51             | <b>9.56</b>  | 9.41              | 3.88              | 6.37  |
|                                                            |          | 0.05 | 8.25             | 10.88            | 10.83            | 3.37             | 9.23  | 9.54                          | 12.34            | 11.97            | 5.38             | 10.04 | 9.65             | <b>12.70</b> | 12.35             | 5.40              | 10.02 |
|                                                            |          | 0.1  | 13.06            | 15.74            | 15.36            | 6.65             | 14.44 | 15.26                         | 20.40            | 19.04            | 8.32             | 16.82 | 15.87            | <b>21.02</b> | 19.48             | 8.62              | 17.31 |
|                                                            |          | 0.2  | 19.27            | 24.31            | 22.41            | 11.59            | 21.69 | 27.39                         | 35.34            | 30.36            | 17.50            | 30.80 | 28.20            | <b>36.27</b> | 31.04             | 18.36             | 31.61 |
|                                                            |          | 0.3  | 23.63            | 30.27            | 26.34            | 16.30            | 27.03 | 36.80                         | 46.68            | 37.53            | 27.54            | 41.53 | 37.82            | <b>47.63</b> | 38.18             | 28.64             | 42.42 |
|                                                            |          | 0.4  | 26.73            | 34.38            | 27.59            | 21.41            | 30.67 | 43.01                         | 53.43            | 40.89            | 35.72            | 48.19 | 44.10            | <b>54.50</b> | 41.56             | 36.61             | 49.10 |
|                                                            |          | 0.5  | 27.95            | 35.86            | 26.35            | 25.31            | 32.33 | 45.49                         | 55.89            | 40.89            | 40.25            | 50.66 | 46.27            | <b>56.73</b> | 41.31             | 41.06             | 51.45 |

Note: Based on 100,000 simulations. Maximum standard error of estimates 0.16%. Bold face indicates the highest power across each row.

Abbreviations: KW – Kruskal-Wallis test
